# Supplementary material for: Effect of Seed Priming with Chitosan Hydrolysate on Lettuce (Lactuca sativa) Growth Parameters
Source: MDPI journal article supplement (doi:10.3390/molecules28041915), 2023-02-17
Supplement: s1 [file s1]

Supplementary materials

# Effect of Seed Priming with Chitosan Hydrolysate on Lettuce (*Lactuca sativa*) Growth Parameters

Tatiana Lyalina \*, Balzhima Shagdarova, Yuliya Zhuikova, Alla Il'ina, Alexey Lunkov and Valery Varlamov \*

Institute of Bioengineering, Research Center of Biotechnology of the Russian Academy of Sciences. 33, bld. 2 Leninsky Ave., Moscow 119071, Russia

\* Correspondence: t.s.lyalina@gmail.com (T.L.); varlamov@biengi.ac.ru (V.V.); Tel.: +7 (499)135-6556

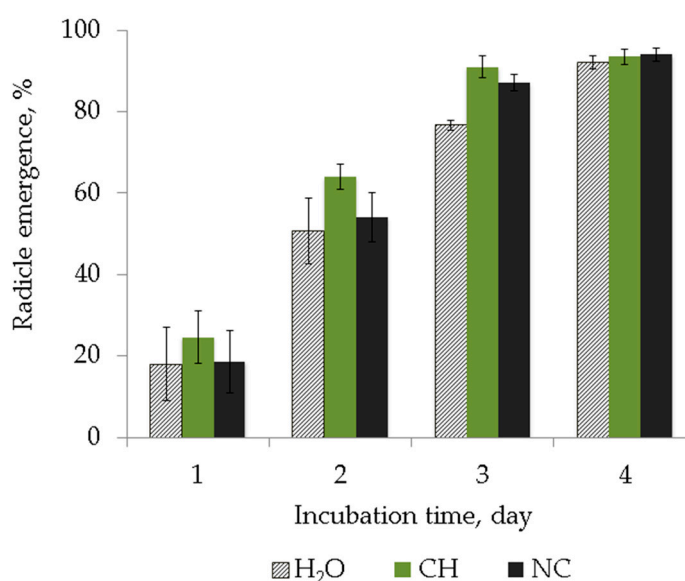

**Figure S1.** Percentage of seeds with emerged radicle in the germination test. Seeds were treated with H<sub>2</sub>O, CH 0.1 mg/mL (dilution ratio 1:250) and NC (dilution ratio 1:250). Error bars represent the standard deviation (SD) for three replicates.

**Table S1.** Effects of CH-, NC- and H<sub>2</sub>O -priming on the morphology of lettuce plants at 10 d after sowing. Seedlings were grown on moistened filter paper.

| Parameters                 | H <sub>2</sub> O | CH concentration mg/ml (dilution ratio) |                     |             | NC dilution ratio |           |           |
|----------------------------|------------------|-----------------------------------------|---------------------|-------------|-------------------|-----------|-----------|
|                            |                  | 0.01<br>(1:2,500)                       | 0.1<br>(1:250)      | 1<br>(1:25) | 1:2,500           | 1:250     | 1:25      |
| Root length, mm            | 46.2±6.7         | 48.7±8.4                                | 56.4±2 <sup>a</sup> | 54.8±7.5    | 52.4±7.1          | 53.7±3.8  | 47.6±2.9  |
| Branched root plants, %    | 25.1±5.0         | 18.8±5.0                                | 29.2±7.5            | 29.2±4.0    | 20.7±3.6          | 27.7±8.5  | 26.5±10.1 |
| Hypocotyl length, mm       | 1.8±0.2          | 1.7±0.1                                 | 1.6±0.2             | 1.7±0.3     | 1.6±0.4           | 1.9±0.3   | 1.6±0.3   |
| Cotyledon length, mm       | 5.7±0.7          | 5.1±0.6                                 | 5.5±0.6             | 5.3±0.3     | 5.4±0.8           | 5.6±0.5   | 5.0±0.7   |
| Plants with true leaves, % | 54.8±5.4         | 54.5±16.6                               | 54.6±9.9            | 58.4±16.6   | 49.6±15.7         | 43.9±15.6 | 47.4±29.2 |

<sup>a</sup>Significant relative to H<sub>2</sub>O according to Mann-Whitney U-test (p < 0.05).

**Table S2.** Effects of CH-, NC- and H<sub>2</sub>O -priming on the shoot and root dry weight of lettuce plants at the 24th and 38th days after sowing.

| Parameter    | 24 day           |                       |      | 38 day           |                     |         |
|--------------|------------------|-----------------------|------|------------------|---------------------|---------|
|              | H <sub>2</sub> O | CH*                   | NC** | H <sub>2</sub> O | CH*                 | NC**    |
| Shoot DW, mg | 44±16            | 69±17 <sup>a</sup>    | 43±7 | 283±23           | 404±30 <sup>a</sup> | 359±133 |
| Root DW, mg  | 7±5              | 13±0.2 <sup>a,b</sup> | 8±1  | 113±58           | 210±6 <sup>a</sup>  | 171±54  |

<sup>a</sup>Significant relative to H<sub>2</sub>O according to Mann-Whitney U-test ( $p < 0.05$ ).

<sup>b</sup> Significant relative to NC solution according to Mann-Whitney U-test ( $p < 0.05$ );

\* CH concentration – 0.1 mg/mL (dilution ratio 1:250);

\*\* Dilution ratio of NC solution 1:250.
